# Supplementary material for: Conserved miR-10 family represses proliferation and induces apoptosis in ovarian granulosa cells
Source: PubMed Central journal article supplement (PMC5256277; doi:10.1038/srep41304), 2017-01-23
Supplement: srep41304-s1.pdf [file srep41304-s1.pdf]

Supplementary information:

Conserved miR-10 family represses proliferation and induces apoptosis in ovarian granulosa cells

Tu Jiajie<sup>1,#</sup>, Yang Yanzhou<sup>1,2</sup>, Albert Cheung Hoi-Hung<sup>1</sup>, Chen Zi-Jiang<sup>3</sup>, Chan Wai-Yee<sup>1\*</sup>

<sup>1</sup> Chinese University of Hong Kong – Shandong University Joint Laboratory for Reproductive Genetics, School of Biomedical Sciences, Faculty of Medicine, the Chinese University of Hong Kong, Hong Kong SAR

<sup>2</sup> Key Laboratory of Fertility Preservation and Maintenance, Ministry of Education, Key Laboratory of Reproduction and Genetics in Ningxia, Department of Histology and Embryology, Ningxia Medical University, Yinchuan, Ningxia, 75004, P.R. China

<sup>3</sup> Center for Reproductive Medicine, Provincial Hospital Affiliated to Shandong University, Jinan, China; National Research Center for Assisted Reproductive Technology and Reproductive Genetics, China; The Key laboratory for Reproductive Endocrinology of Ministry of Education, China; Shandong Provincial Key Laboratory of Reproductive Medicine, Jinan, China

\*To whom all correspondence should be addressed at:

School of Biomedical Sciences, Room G03, Ground Floor, Lo Kwee-Seong Integrated Biomedical Sciences Building, The Chinese University of Hong Kong, Shatin, N.T., Hong Kong SAR, China.

Tel: +852-3943 1383

E-mail: [chanwy@cuhk.edu.hk](mailto:chanwy@cuhk.edu.hk)

# Current address: Institute of Clinical Pharmacology, Anhui Medical University, China

Supplementary figure 1. (A) The precursor sequences of miR-10 and miR-10b of human, mouse and rat. The red color highlights the mature sequences of miRNA and the green color indicates the difference of sequences among different species. (B) The amplification plot of qPCR shows the expression of miR-10a and miR-10b significantly increase after corresponding miRNA mimics transfection. (C) FISH results show the expression pattern of miR-10a and miR-10b in rat ovary. (D) Gene Ontology results of DEG in miR-10b overexpressed GCs. (E) Pathway analysis results of DEG in miR-10b overexpressed GCs. (F) The reverse expression patterns of BDNF and miR-10b in mouse ovary. (G) The western blot results show BDNF was repressed by shRNA in GCs. (H) The full-length western-blot results.

Supplementary table 1. All oligo sequences that included in this manuscript.

A

|                                                             |                                                             |
|-------------------------------------------------------------|-------------------------------------------------------------|
| >hsa-miR-10a-5p<br>U <b>ACCCUGU</b> AGA <b>UCCGAAUUUGUG</b> | >hsa-miR-10b-5p<br>U <b>ACCCUGU</b> AGA <b>ACCGAAUUUGUG</b> |
| >mmu-miR-10a-5p<br>U <b>ACCCUGU</b> AGA <b>UCCGAAUUUGUG</b> | >mmu-miR-10b-5p<br>U <b>ACCCUGU</b> AGA <b>ACCGAAUUUGUG</b> |
| >Rho-miR-10a-5p<br>U <b>ACCCUGU</b> AGA <b>UCCGAAUUUGUG</b> | >rno-miR-10b-5p<br><b>CCUGU</b> AGA <b>ACCGAAUUUGUGU</b>    |

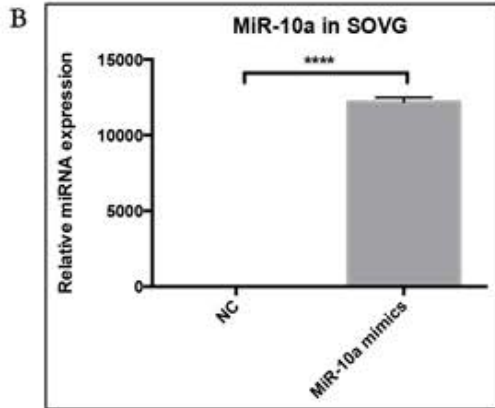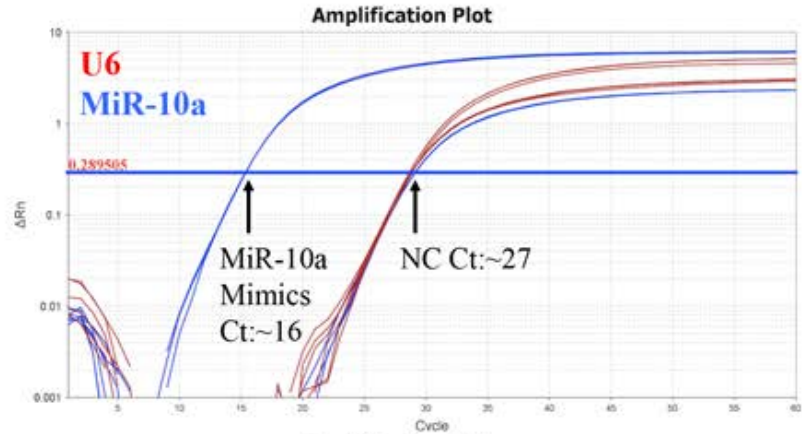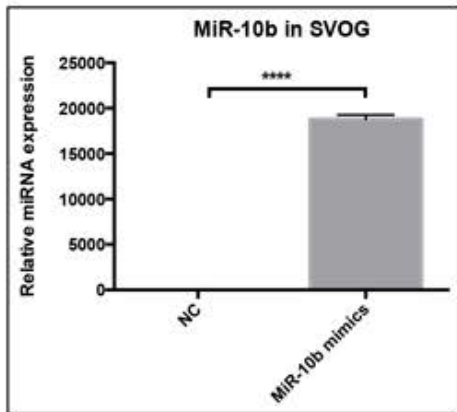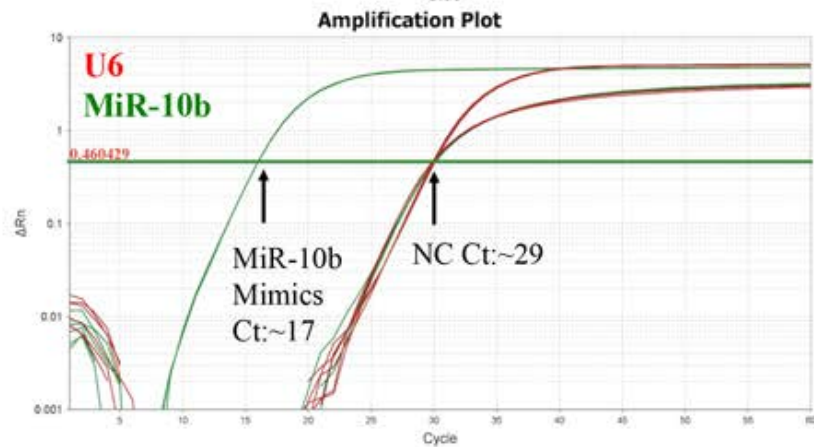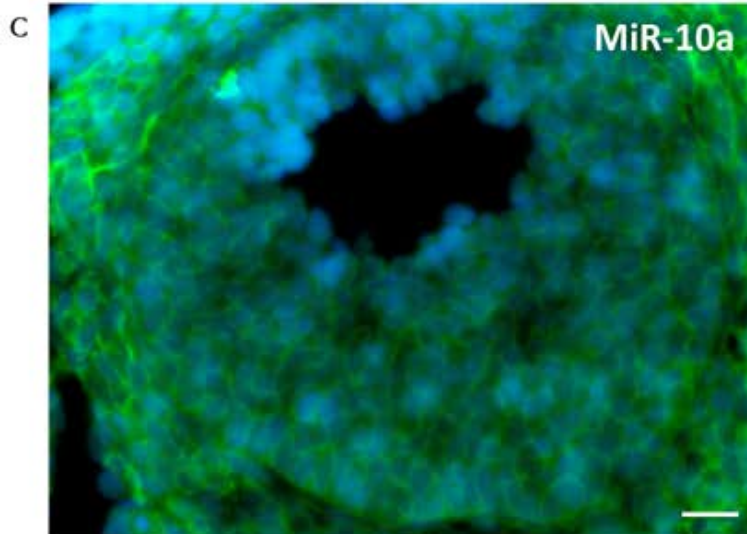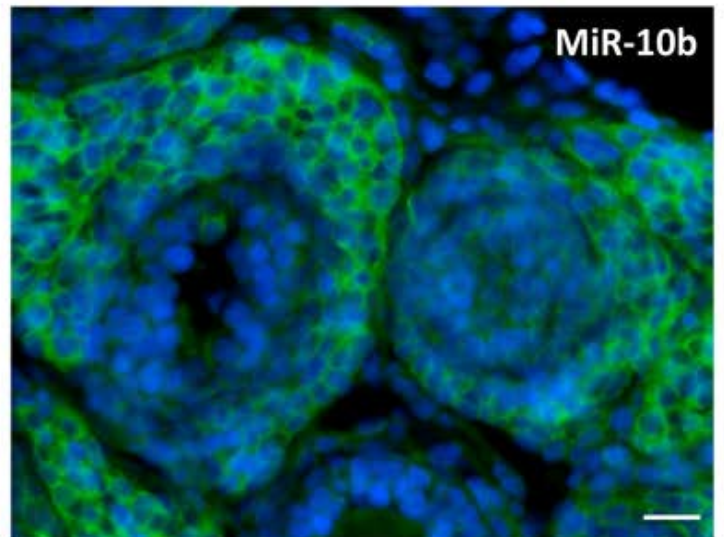

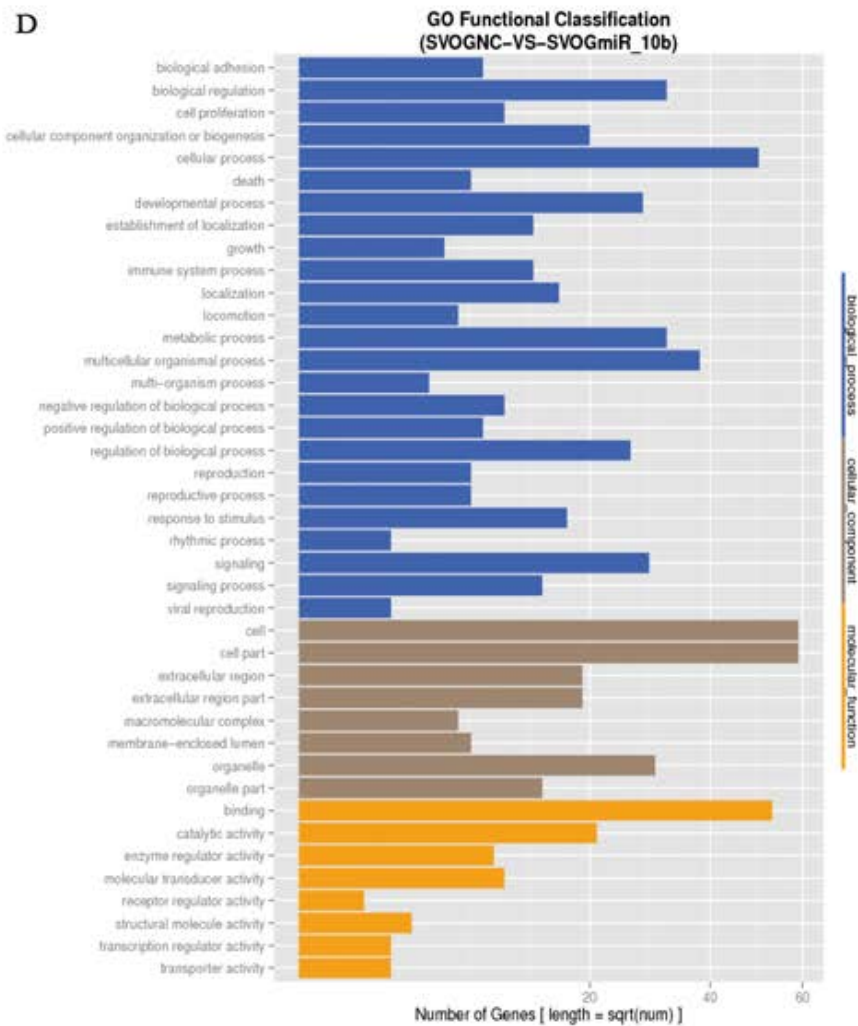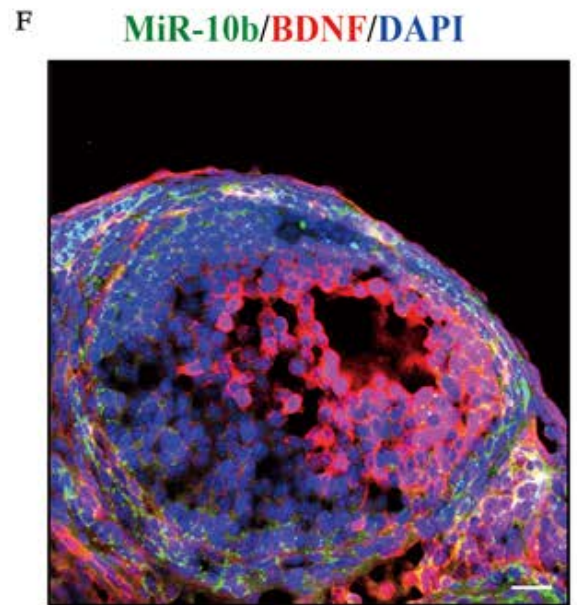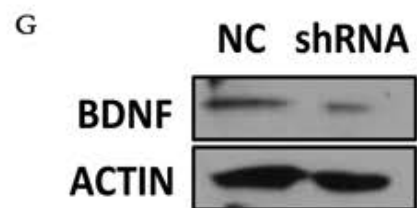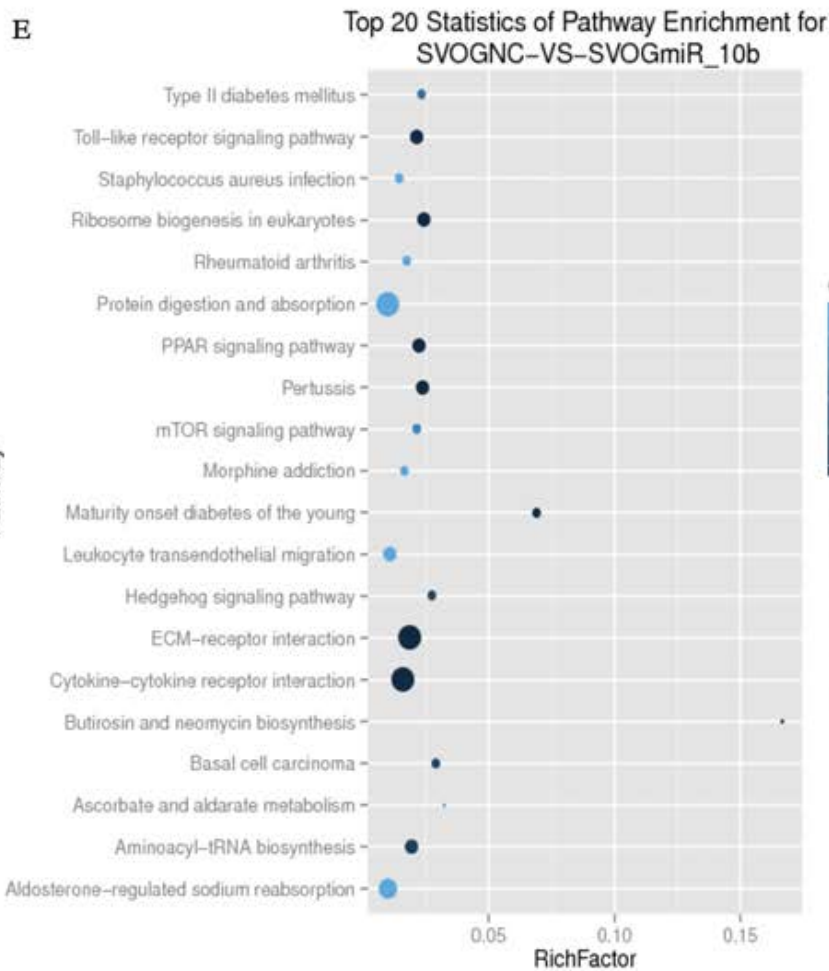



60'

NC ADNA

ACTW  
BMF

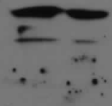

| primer name     | sequence                                               |
|-----------------|--------------------------------------------------------|
| BDNF 1# shRNA F | GATCCCCGGCCAAGCAATACTTTCAAGAGAAGTATTGCTTCAGTTGGCCTTTTA |
| BDNF 1# shRNA R | AGCTTAAAAAGCCAAGCAATACTTCTCTTGAAAGTATTGCTTCAGTTGGCCGGG |
| BMP4 qPCR F     | TGGGCTGGAATGACTGGATT                                   |
| BMP4 qPCR R     | TGGCATGGTTGGTTGAGTTG                                   |
| AMH qPCR F      | CAGCTCTATCACTGGGGAGG                                   |
| AMH qPCR R      | CAGACCCCTATCTCCTCTGC                                   |
| BDNFqPCR F      | CACCAAGACTTGAAGGTGCC                                   |
| BDNFqPCR R      | ATGAACAGACAGGATGGGCA                                   |
| SMAD1 qPCR F    | GTAATTCCTCCTGTGCTGGT                                   |
| SMAD1 qPCR R    | TGGAAAAGTGGCGTTGAGTG                                   |
| SAMD3 qPCR F    | GAGGGAGATGGAGAGGCTTC                                   |
| SAMD3 qPCR R    | CCTTCCGTCTTCTCCTGTGT                                   |
| SAMD6 qPCR F    | GATTCCCAGCAGCTCTTTGG                                   |
| SAMD6 qPCR R    | GATTTCATGCACGAAAGGC                                    |
| ACVR1 qPCR F    | CCTAACCTCGCTCGATGACT                                   |
| ACVR1 qPCR R    | CTCCAGTCCCTACCTTTGCA                                   |
